# Supplementary material for: Corrigendum: Large Vessel Activity and Low-Frequency Underwater Sound Benchmarks in United States Waters
Source: Frontiers journal article supplement (doi:10.3389/fmars.2022.881644), 2022-05-10
Supplement: Table_1.DOCX [file Table_1.DOCX]

| **Site** | **Median 63 Hz TOB** | **Median 125 Hz TOB** | **Max 63 Hz TOB** | **Max 125 Hz TOB** | **Min 63 Hz TOB** | **Min 125 Hz TOB** |
| --- | --- | --- | --- | --- | --- | --- |
| Gulf of Mexico | 116.91 dB | 109.79 dB | 128.10 dB | 120.63 dB | 107.27 dB | 102.63 dB |
| Cordell Bank | 99.46 dB | 97.99 dB | 111.55 dB | 107.27 dB | 94.86 dB | 93.26 dB |
| Northeast Canyons | 108.93 dB | 104.45 dB | 120.65 dB | 111.06 dB | 104.09 dB | 98.93 dB |
| Hawaii | 88.18 dB | 85.62 dB | 93.32 dB | 92.06 dB | 84.34 dB | 82.25 dB |
| Beaufort Sea | 85.92 dB | 84.83 dB | 101.74 dB | 99.46 dB | 76.93 dB | 78.51 dB |

Supplemental Table 1. Median, maximum, and minimum daily sound pressure levels (dB re 1 μPa) for both 63 Hz and 125 Hz one-third octave bands at each of the five sites during the 2016-2017 sampling time period.
